# Supplementary material
Source: PubMed Central journal article supplement (PMC11149397)
Supplement: NIHMS1995194-supplement-Supplemental_tables_figure.pdf [file NIHMS1995194-supplement-Supplemental_tables_figure.pdf]

| <b>Supplemental table 1:</b> Baseline surgical ICU cohort characteristics                                                                                                                                                                                                                  | <b>ROTEM SICU cohort N=121</b> |
|--------------------------------------------------------------------------------------------------------------------------------------------------------------------------------------------------------------------------------------------------------------------------------------------|--------------------------------|
| <b>Age:</b> mean (SD)                                                                                                                                                                                                                                                                      | 64 (18)                        |
| <b>Male:</b> N (%)                                                                                                                                                                                                                                                                         | 59 (49)                        |
| <b>Race/ethnicity:</b> N (%)                                                                                                                                                                                                                                                               |                                |
| White                                                                                                                                                                                                                                                                                      | 67 (55)                        |
| Black                                                                                                                                                                                                                                                                                      | 16 (13)                        |
| Hispanic                                                                                                                                                                                                                                                                                   | 18 (15)                        |
| Other                                                                                                                                                                                                                                                                                      | 12 (10)                        |
| <b>Surgery type:</b> N (%)                                                                                                                                                                                                                                                                 |                                |
| Neurosurgery (brain/spine)                                                                                                                                                                                                                                                                 | 40 (33)                        |
| Gastrointestinal (non-liver)                                                                                                                                                                                                                                                               | 33 (27)                        |
| Orthopedic                                                                                                                                                                                                                                                                                 | 26 (21)                        |
| Liver                                                                                                                                                                                                                                                                                      | 7 (6)                          |
| Other                                                                                                                                                                                                                                                                                      | 15 (13)                        |
| <b>Baseline Hemoglobin (g/dL):</b> mean (SD)                                                                                                                                                                                                                                               | 10.9 (1.4)                     |
| <b>Traditional Coagulation Laboratory Testing:</b> mean (SD)                                                                                                                                                                                                                               |                                |
| International Normalized Ratio                                                                                                                                                                                                                                                             | 1.2 (0.1)                      |
| Partial Thromboplastin Time (seconds)                                                                                                                                                                                                                                                      | 30.4 (5.1)                     |
| Platelet Count (10 <sup>3</sup> /uL)                                                                                                                                                                                                                                                       | 208 (60)                       |
| <b>ROTEM testing:</b> median (IQR)                                                                                                                                                                                                                                                         |                                |
| EXTEM CT (sec)                                                                                                                                                                                                                                                                             | 48 (42-58)                     |
| EXTEM CFT (sec)                                                                                                                                                                                                                                                                            | 70 (73-79)                     |
| EXTEM alpha (deg)                                                                                                                                                                                                                                                                          | 76 (73-79)                     |
| EXTEM MCF (mm)                                                                                                                                                                                                                                                                             | 67 (63-71)                     |
| INTEM CT (sec)                                                                                                                                                                                                                                                                             | 163 (152-176)                  |
| INTEM CFT (sec)                                                                                                                                                                                                                                                                            | 61 (51-70)                     |
| INTEM alpha (deg)                                                                                                                                                                                                                                                                          | 78 (76-80)                     |
| INTEM MCF (mm)                                                                                                                                                                                                                                                                             | 64 (61-68)                     |
| FIBTEM MCF (mm)                                                                                                                                                                                                                                                                            | 17 (14-22)                     |
| ROTEM: Rotational Thromboelastometry; SD: standard deviation; SBP: systolic blood pressure; IQR: interquartile range; EXTEM: extrinsic pathway assay; INTEM: intrinsic pathway assay; FIBTEM: fibrinogen assay; CT: coagulation time; CFT: clot formation time; MCF: maximal clot firmness |                                |

**Supplemental table 2:** Univariable and multivariable linear regression assessing association of hemoglobin with ROTEM VHA result in surgical ICU patients

| <b>ROTEM Outcome</b>            | <b>Unadjusted B (95%CI) p-value</b> | <b>Adjusted B (95%CI) p-value*</b> |
|---------------------------------|-------------------------------------|------------------------------------|
| <b>EXTEM CT (seconds)</b>       | -0.04 (-2.82 to 1.90)<br>P=0.70     | -0.06 (-3.42 to 1.83)<br>P=0.55    |
| <b>EXTEM CFT (seconds)</b>      | 0.31 (2.32 to 8.36)<br>P=0.001      | 0.31 (2.44 to 8.97)<br>P=0.001     |
| <b>EXTEM alpha (degrees)</b>    | -0.36 (-1.81 to -0.66)<br>P<0.0001  | -0.37 (-1.92 to -0.68)<br>P<0.0001 |
| <b>EXTEM MCF (millimeters)</b>  | -0.36 (-2.14 to -0.77)<br>P<0.0001  | -0.35 (-2.22 to -0.75)<br>P<0.0001 |
| <b>EXTEM ML (%)</b>             | NA                                  | NA                                 |
| <b>INTEM CT (seconds)</b>       | 0.14 (-0.77 to 5.82)<br>P=0.13      | 0.14 (-0.92 to 6.21)<br>P=0.14     |
| <b>INTEM CFT (seconds)</b>      | 0.33 (1.89 to 6.19)<br>P<0.0001     | 0.32 (1.86 to 6.48)<br>P=0.001     |
| <b>INTEM alpha (degrees)</b>    | -0.38 (-1.23 to -0.45)<br>P<0.0001  | -0.37 (-1.29 to -0.45)<br>P<0.0001 |
| <b>INTEM MCF (millimeters)</b>  | -0.41 (-2.32 to -0.94)<br>P<0.0001  | -0.39 (-2.42 to -0.95)<br>P<0.0001 |
| <b>INTEM ML (%)</b>             | NA                                  | NA                                 |
| <b>FIBTEM MCF (millimeters)</b> | -0.35 (-3.01 to -1.06)<br>P<0.0001  | -0.39 (-3.42 to -1.32)<br>p<0.0001 |

ROTEM: Rotational Thromboelastometry; VHA: viscoelastic hemostatic assay; CI: confidence interval; EXTEM: extrinsic pathway assay; INTEM: intrinsic pathway assay; FIBTEM: fibrinogen assay; CT: coagulation time; CFT: clot formation time; MCF: maximal clot firmness; ML: maximum lysis

\*Adjusted for age, sex, surgery type

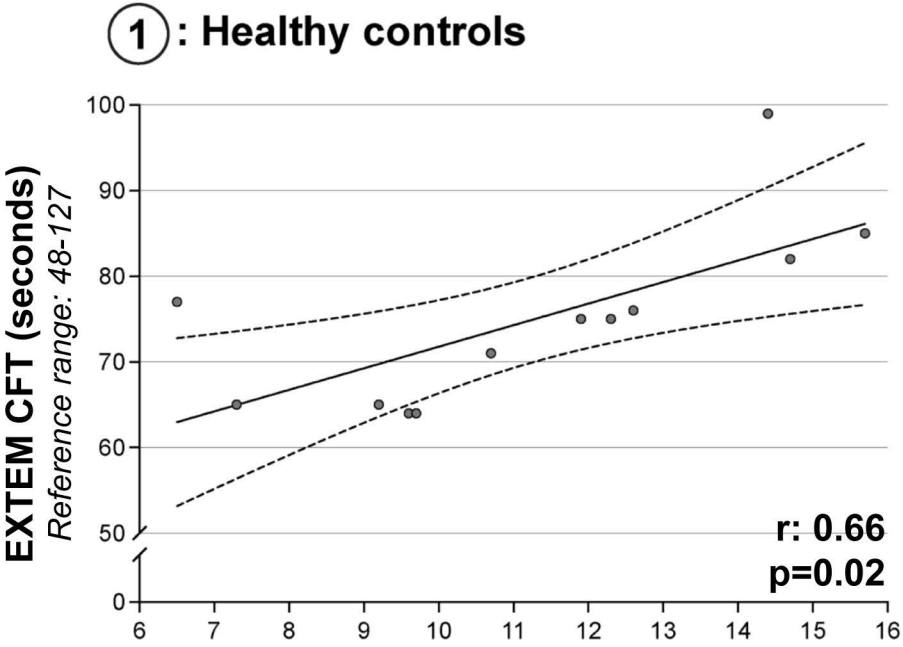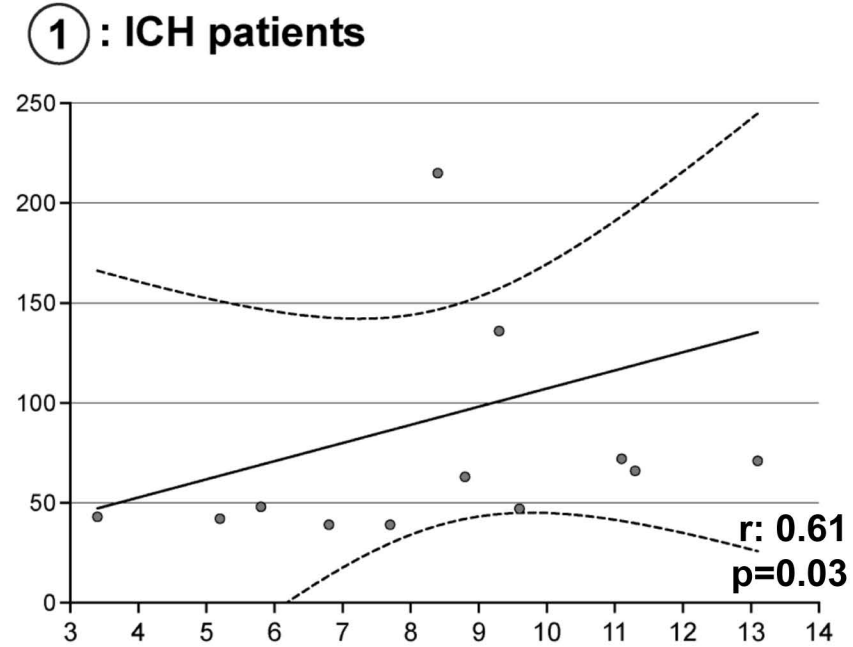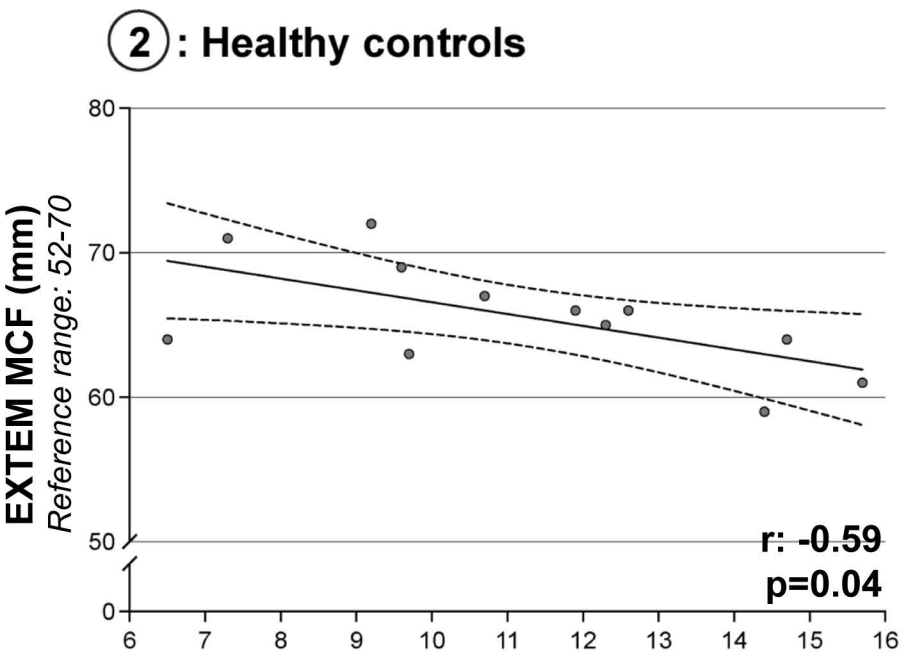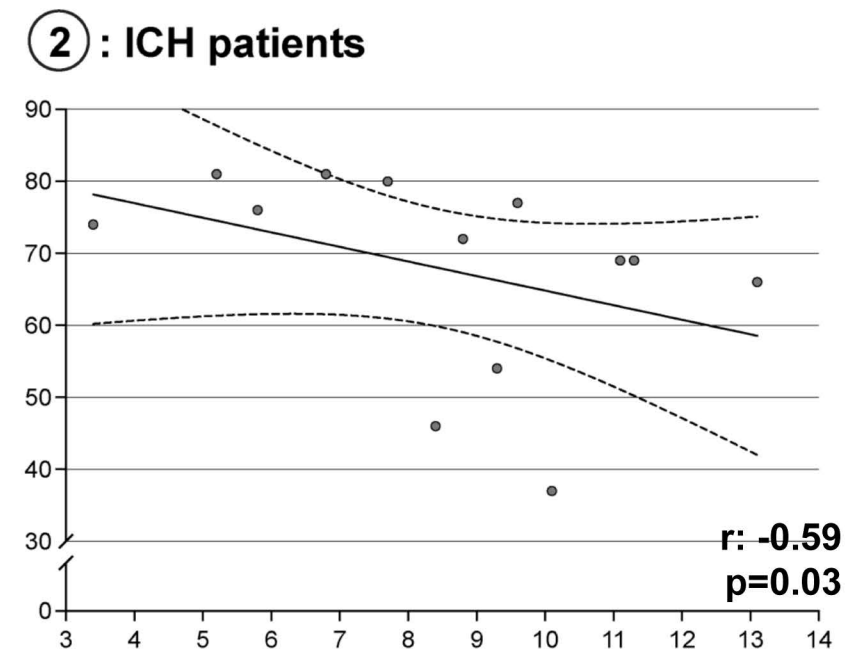

**Supplemental Figure 1: in vitro study Hgb-ROTEM correlations**

**Hemoglobin (g/dL)**  
Range male: 13.3-16.2, female: 12.0-15.8
